# Supplementary material for: Delayed Exercise Training Improves Obesity-Induced Chronic Kidney Disease by Activating AMPK Pathway in High-Fat Diet-Fed Mice
Source: PubMed Central journal article supplement (PMC7795787; doi:10.3390/ijms22010350), 2020-12-31
Supplement: ijms-22-00350-s001.pdf [file ijms-22-00350-s001.pdf]

Supplementary

# Delayed Exercise Training Improves Obesity-Induced Chronic Kidney Disease by Activating AMPK Pathway in High-Fat Diet-Fed Mice

Florian Juszcak <sup>1,2,\*</sup>, Maud Vlassembrouck <sup>1</sup>, Olivia Botton <sup>2</sup>, Thomas Zwakhals <sup>1</sup>, Morgane Decarnoncle <sup>1</sup>, Alexandra Tassin <sup>3</sup>, Nathalie Caron <sup>2</sup> and Anne-Emilie Declèves <sup>1</sup>

<sup>1</sup> Laboratory of Metabolic and Molecular Biochemistry, Faculty of Medicine and Pharmacy, Research Institute for Health Sciences and Technology, University of Mons (UMONS), 7000 Mons, Belgium; maudvlassembrouck@gmail.com (M.V.); Thomas.ZWAKHALS@umons.ac.be (T.Z.); Morgane.decarnoncle@student.umons.ac.be (M.D.); anne-emilie.decleves@umons.ac.be (A.-E.D.)

<sup>2</sup> Molecular Physiology Research Unit (URPhyM), Namur Research Institute for Life Sciences (NARILIS), University of Namur (UNamur), 5000 Namur, Belgium; olivia.botton@unamur.be (O.B.); nathalie.caron@unamur.be (N.C.)

<sup>3</sup> Laboratory of Respiratory Physiology, Pathophysiology and Rehabilitation, Faculty of Medicine and Pharmacy, Research Institute for Health Sciences and Technology, University of Mons (UMONS), 7000 Mons, Belgium; anne-emilie.decleves@umons.ac.be

\* Correspondence: florian.juszcak@umons.ac.be; Tel.: +3265373580

**Citation:** Juszcak, F.; Vlassembrouck, M.; Botton, O.; Zwakhals, T.; Decarnoncle, M.; Tassin, A.; Caron, N.; Declèves, A.-E. Delayed exercise training improves obesity-induced chronic kidney disease by activating AMPK pathway in high-fat diet-fed mice. *Int. J. Mol. Sci.* **2020**, *22*, x. <https://doi.org/10.3390/xxxxx>

Received: 14 November 2020

Accepted: 26 December 2020

Published: date

**Publisher's Note:** MDPI stays neutral with regard to jurisdictional claims in published maps and institutional affiliations.

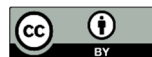

**Copyright:** © 2020 by the authors. Submitted for possible open access publication under the terms and conditions of the Creative Commons Attribution (CC BY) license (<http://creativecommons.org/licenses/by/4.0/>).

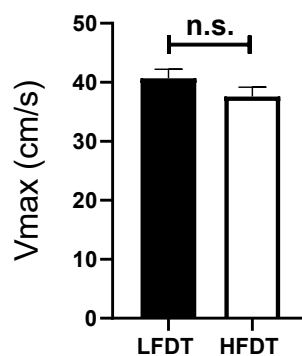

**Figure S1.** Effects of endurance exercise training on running velocity. Representation of maximal running velocity performance after 14 weeks on diet. *t*-test. Data are presented as means  $\pm$  SEM. *ns* = non-significant. *n*=10 in each group.

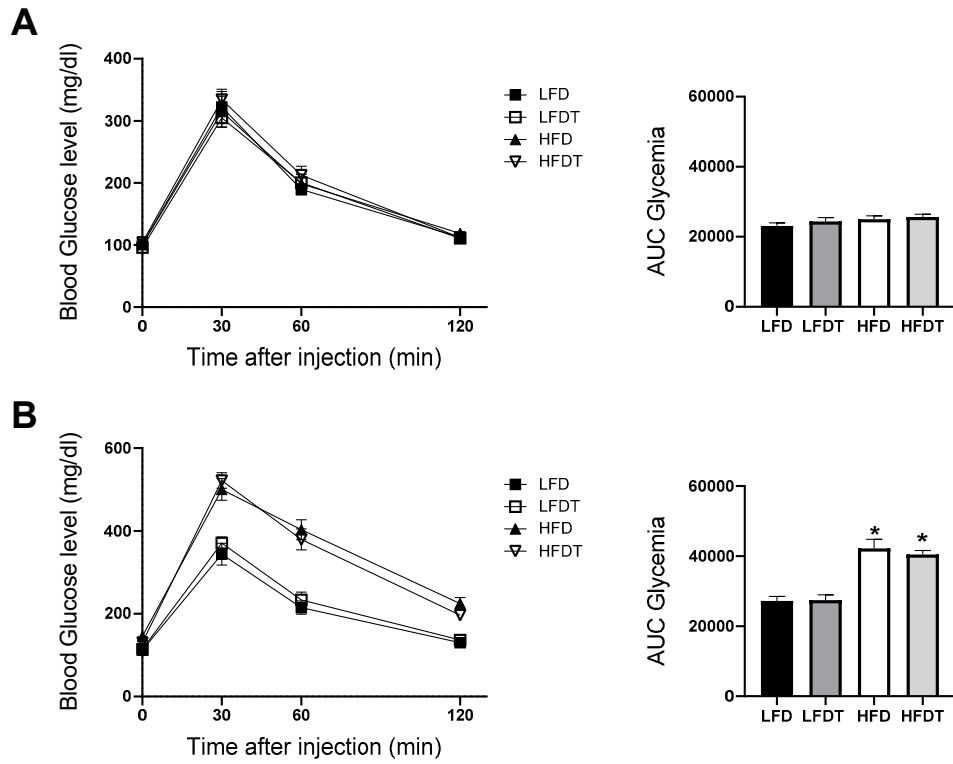

**Figure S2.** Effects of LFD and HFD on glucose tolerance in mice. Glucose tolerance test at week 0 (**A**) and week 12 (**B**). Fasted mice were submitted to an intraperitoneal injection of glucose (2 g/ kg b.w.). Glycemia was measured before (0) and 30, 60 and 120 min after injection. Histogram represents the area under the curve (AUC) of glycemia from 0 to 120 min

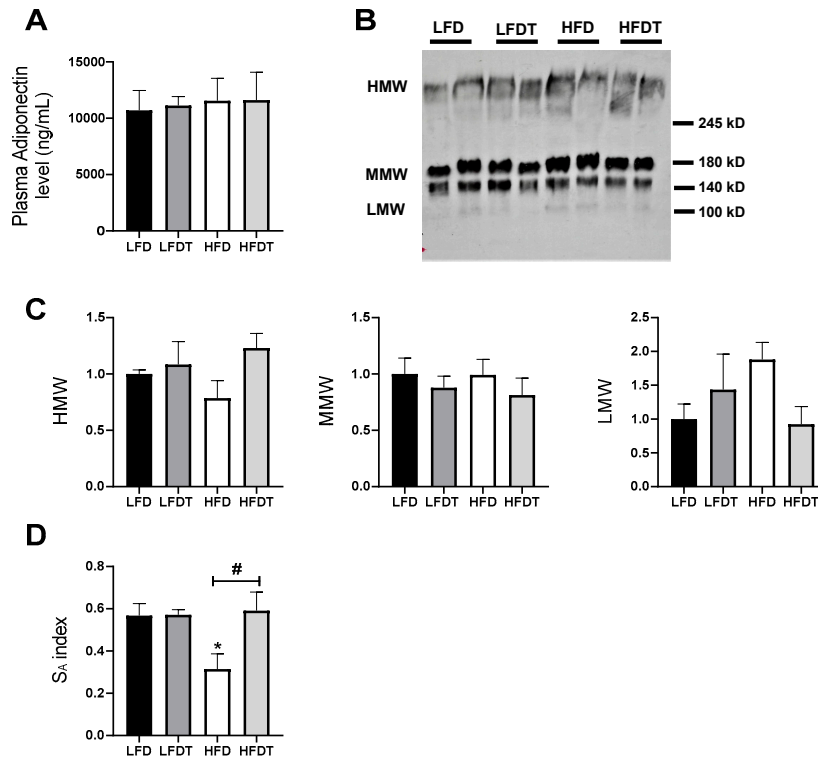

**Figure S3.** Total plasma adiponectin and adiponectin multimers distribution analysis at week 20. **A.** Adiponectin plasma level. The total plasma Adiponectin concentration was measured using indirect ELISA. **B.** Representative immunoblots of Adiponectin multimers expression in plasma sample. **C.** Relative densitometry of the immunoblots representing respectively HMW (High Molecular Weight), MMW (Medium Molecular Weight) and LMW (Low Molecular Weight) multimers of Adiponectin normalized with total Adiponectin protein level. **D.** SA index was calculated as the ratio  $HMW/(HMW + LMW)$ . Data are presented as means  $\pm$  SEM. \*  $P \leq 0.05$  versus LFD #  $P \leq 0.05$  versus HFD.  $n=6-8$  in each group.

**Table S1.** Primer sequences for RT-qPCR analysis of mRNA expression

| <b>Gene</b>          |    | <b>Primer Sequences (5'-3')</b> |
|----------------------|----|---------------------------------|
| <i>COL1</i>          | Fw | CTTGCCCCATTCATTTGTCT            |
|                      | Rv | GCAGGTTACCTACTCTGTTCT           |
| <i>COL3A3</i>        | Fw | TGAGTCGAATTGGGGAGAAT            |
|                      | Rv | TCCCCTGGAATCTGTGAATC            |
| <i>TGFβ</i>          | Fw | TGGAGCAACATGTGGAACTC            |
|                      | Rv | GTCAGCAGCCGTTACCA               |
| <i>MCP-1</i>         | Fw | CTTCTGGGCCTGCTGTTCA             |
|                      | Rv | CCAGCCTACTCATTGGGATCA           |
| <i>IL1β</i>          | Fw | AGTTGACGGACCCCAAAAG             |
|                      | Rv | AGCTGGATGCTCTCATCAGG            |
| <i>TNFα</i>          | Fw | TACTGAACTTCGGGGTGATTGGTCC       |
|                      | Rv | CAGCCTTGTCCTTGAAGAGAACC         |
| <i>IL6</i>           | Fw | GCTACCAAACCTGGATATAATCAGGA      |
|                      | Rv | CCAGGTAGCTATGGTACTCCAGAA        |
| <i>ACC (Acaca)</i>   | Fw | ATGGGCGGAATGGTCTCTTTC           |
|                      | Rv | TGGGGACCTTGTCTTCATCAT           |
| <i>FAS (FASN)</i>    | Fw | GGAGGTGGTGATAGCCGGTAT           |
|                      | Rv | TGGGTAATCCATAGAGCCCAG           |
| <i>CPT-1 (CPT1a)</i> | Fw | CTCCGCCTGAGCCATGAAG             |
|                      | Rv | CACCAGTGATGATGCCATTCT           |
| <i>18S</i>           | Fw | CGCCGCTAGAGGTGAAATTCT           |
|                      | Rv | CGAACCTCCGACTTTCGTTCT           |

**Table S2.** Effects of delayed EET on systolic, diastolic and mean blood pressure in mice fed a LFD, LFDT or HFD and HFDT.

|                                               | <b>LFD</b>    | <b>LFDT</b>   | <b>HFD</b>    | <b>HFDT</b>   |
|-----------------------------------------------|---------------|---------------|---------------|---------------|
| <b><i>Systolic blood pressure (mmHg)</i></b>  | 128,6 ± 10,99 | 138,0 ± 4,988 | 119,5 ± 10,86 | 119,3 ± 5,850 |
| <b><i>Diastolic blood pressure (mmHg)</i></b> | 106,8 ± 10,60 | 117,6 ± 2,584 | 96,33 ± 8,750 | 101,7 ± 6,035 |
| <b><i>Mean blood pressure (mmHg)</i></b>      | 117,7 ± 10,78 | 127,8 ± 3,763 | 107,9 ± 9,768 | 110,5 ± 5,570 |

Measurement were performed during the last week of the experimental protocol (week 20). Systemic, diastolic and mean blood pressures were measured using a non-invasive CODA tail-cuff blood pressure occlusion system (Kent Scientific, Torrington, USA). During the week 20, measurements were taken for each animal that were acclimatized for a 1-hour period before experiments into restraining chambers. The animals were placed onto a preheated pad maintained at 30°C in a designed quiet area and blood pressure measurements were initiated when tail temperature reached 30°C (measured using an infrared sensor) and recorded at least 5 times. Mice were acclimated for at least 3 consecutive days before baseline blood pressure measurements. No statistical difference was found by One-way ANOVA analysis.  $n=5$  in each group.

**Table S3.** Effects of delayed EET on renal gene expression in mice fed a LFD, a LFDT, a HFD and a HFDT.

|                                        | <b>LFD</b>     | <b>LFDT</b>     | <b>HFD</b>      | <b>HFDT</b>    |
|----------------------------------------|----------------|-----------------|-----------------|----------------|
| <b><i>Lipid metabolism markers</i></b> |                |                 |                 |                |
| <i>ACC</i>                             | 1,000 ± 0,0918 | 0,9636 ± 0,1356 | 1,067 ± 0,1404  | 1,028 ± 0,0796 |
| <i>FAS</i>                             | 1,000 ± 0,0265 | 1,023 ± 0,1480  | 1,218 ± 0,2496  | 1,112 ± 0,1884 |
| <i>CPT-1</i>                           | 1,000 ± 0,0326 | 0,9017 ± 0,1308 | 0,8483 ± 0,1201 | 1,222 ± 0,2337 |

Real-time quantitative qPCR for Acetyl-CoA carboxylase (*ACC*), Fatty acid synthase (*FAS*) and Carnitine palmitoyltransferase I (*CPT1*). mRNA expressions were performed on kidney tissue from LFD, LFDT, HFD and HFDT mice normalized against 18S. Statistical analyses were performed by one-way ANOVA followed by Newman-Keuls post hoc test. Data are presented as means ± SEM. \*  $P \leq 0.05$  versus LFD #  $P \leq 0.05$  versus HFD.  $n=6$  in each group.
